# Supplementary material for: The molecular origin of high performance in ternary organic photovoltaics identified using a combination of in situ structural probes
Source: Royal Society of Chemistry journal article supplement (doi:10.1039/d2ta07209b), 2022-12-20
Supplement: d2ta07209b1.pdf [file d2ta07209b1.pdf]

## Supporting Information

### The molecular origin of high performance in ternary organic photovoltaics identified by combinatory *in situ* structural probes

Joel Luke<sup>1,†</sup>, Yong-Ryun Jo<sup>3,†</sup>, Chieh-Ting Lin<sup>2</sup>, Soonil Hong<sup>4</sup>, Chandran Balamurugan<sup>4,6</sup>,  
Jehan Kim<sup>7</sup>, Byoungwook Park<sup>4</sup>, Kwanghee Lee<sup>3,4,5</sup>, James R. Durrant<sup>2</sup>, Sooncheol Kwon<sup>6,\*</sup>,  
Bong-Joong Kim<sup>3,\*</sup>, Ji-Seon Kim<sup>1,\*</sup>

<sup>1</sup>Department of Physics and Centre for Processable Electronics, Imperial College London,  
London, SW7 2AZ, UK

<sup>2</sup>Department of Chemistry and Centre for Processable Electronics, Imperial College London,  
London, SW7 2AZ, United Kingdom

<sup>3</sup>School of Materials Science and Engineering (SMSE), Gwangju Institute of Science and  
Technology (GIST), Gwangju 500–712, Republic of Korea

<sup>4</sup>Heeger Center for Advanced Materials (HCAM), Gwangju Institute of Science and  
Technology (GIST), Gwangju 500–712, Republic of Korea

<sup>5</sup>Research Institute for Solar and Sustainable Energies (RISE), Gwangju Institute of Science  
and Technology (GIST), Gwangju 500–712, Republic of Korea

<sup>6</sup>Department of Energy and Materials Engineering, Dongguk University-Seoul, Seoul, 04620  
Republic of Korea

<sup>7</sup>Pohang Accelerator Laboratory (PAL), Pohang University of Science and Technology  
(POSTECH), Pohang 790–784, Republic of Korea

\*Correspondence to: kwansc12@dongguk.edu; kimbj@gist.ac.kr; ji-  
seon.kim@imperial.ac.uk

† J. L. and Y. J. contributed equally to this work.

| <b>BHJ Samples</b> | <b>Annealing Temperature (°C)</b> | <b>Jsc (mA/cm<sup>2</sup>)</b> | <b>Voc (V)</b>    | <b>FF</b>         | <b>PCE (%)</b>   |
|--------------------|-----------------------------------|--------------------------------|-------------------|-------------------|------------------|
| <b>Binary</b>      | 50                                | 8.29<br>(±0.010)               | 0.760<br>(±0.004) | 0.539<br>(±0.032) | 3.40<br>(±0.006) |
| <b>Binary</b>      | 85                                | 8.58<br>(±0.030)               | 0.790<br>(±0.006) | 0.636<br>(±0.026) | 4.36<br>(±0.032) |
| <b>Binary</b>      | 125                               | 11.6<br>(±0.230)               | 0.710<br>(±0.002) | 0.586<br>(±0.028) | 4.88<br>(±0.192) |
| <b>Binary</b>      | 160                               | 10.8<br>(±0.200)               | 0.730<br>(±0.005) | 0.548<br>(±0.027) | 4.26<br>(±0.078) |
| <b>Ternary</b>     | 50                                | 4.17<br>(±0.120)               | 0.770<br>(±0.004) | 0.308<br>(±0.028) | 0.94<br>(±0.011) |
| <b>Ternary</b>     | 85                                | 10.2<br>(±0.502)               | 0.800<br>(±0.004) | 0.477<br>(±0.016) | 3.86<br>(±0.015) |
| <b>Ternary</b>     | 125                               | 11.3<br>(±0.350)               | 0.820<br>(±0.007) | 0.556<br>(±0.006) | 5.37<br>(±0.163) |
| <b>Ternary</b>     | 160                               | 10.8<br>(±0.540)               | 0.810<br>(±0.005) | 0.600<br>(±0.004) | 5.26<br>(±0.179) |

**Table S1.** Summary average of device parameters of binary and ternary OPVs annealed at different temperatures. The corresponding average and standard deviations for each parameter were derived from more than four devices.

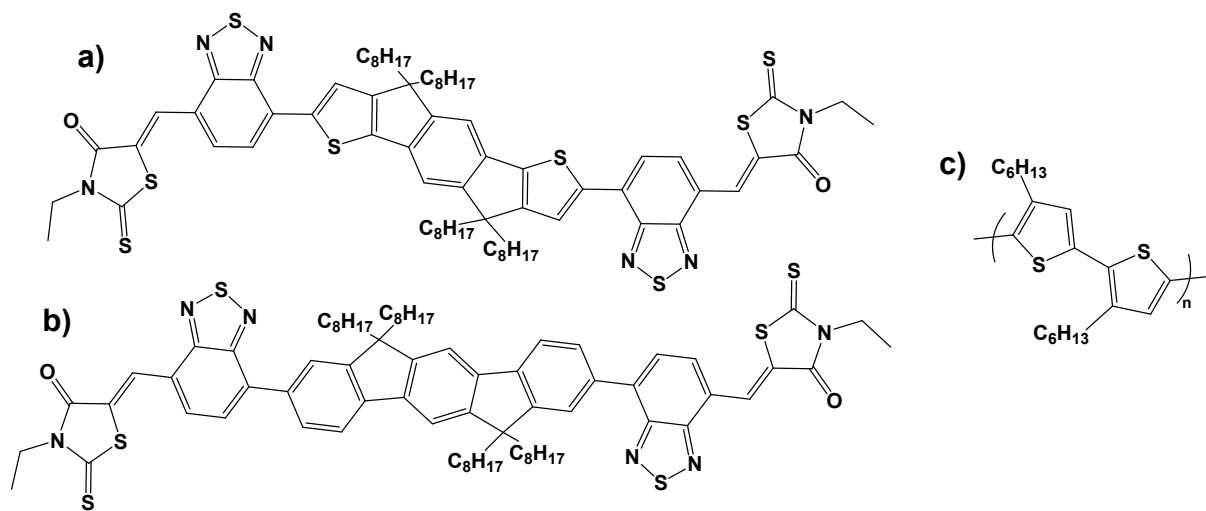

**Figure S1.** Chemical structures of O-IDTBR (a), O-IDFBR (b), and P3HT (c).

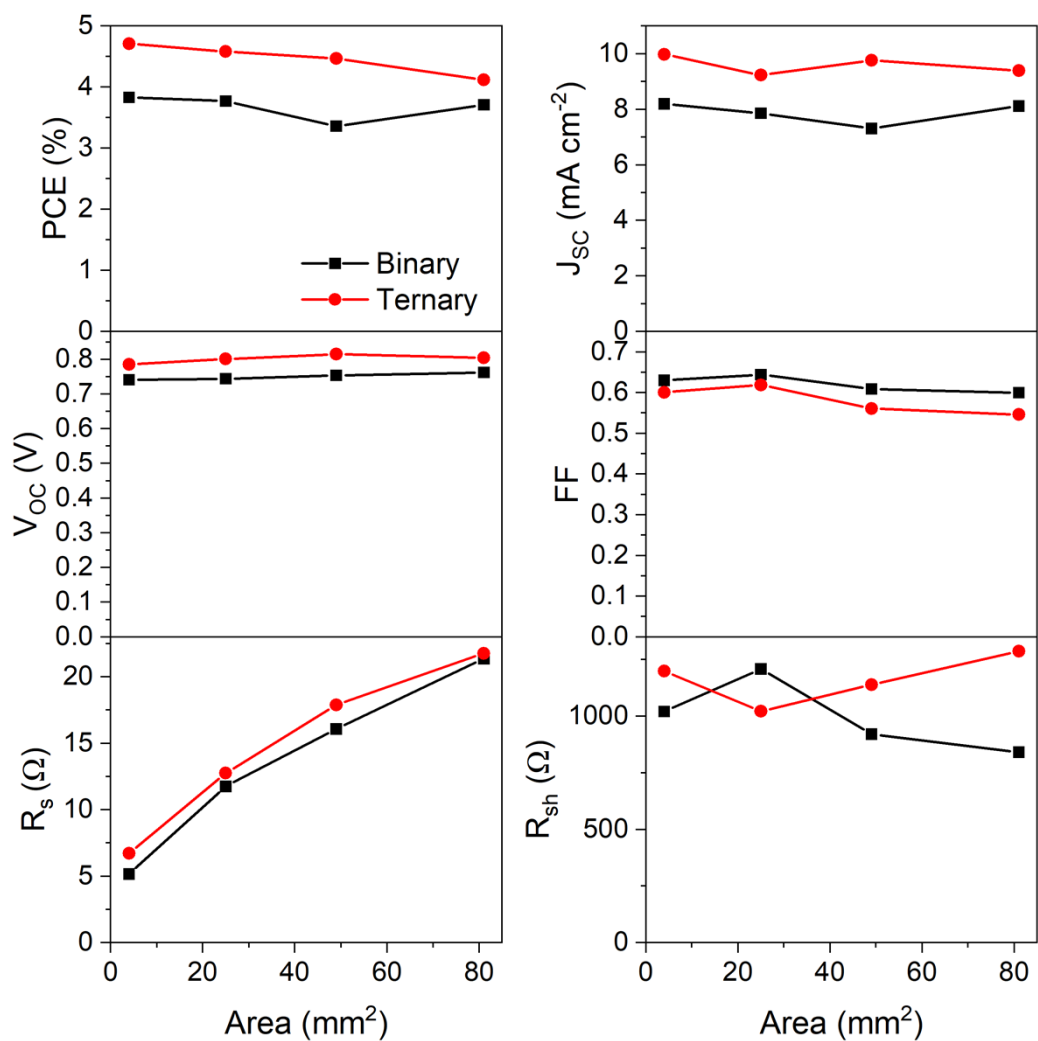

**Figure S2.** Area dependent device performance: Device parameters for the binary and ternary blends as a function of device area for the fresh devices used in the degradation study.

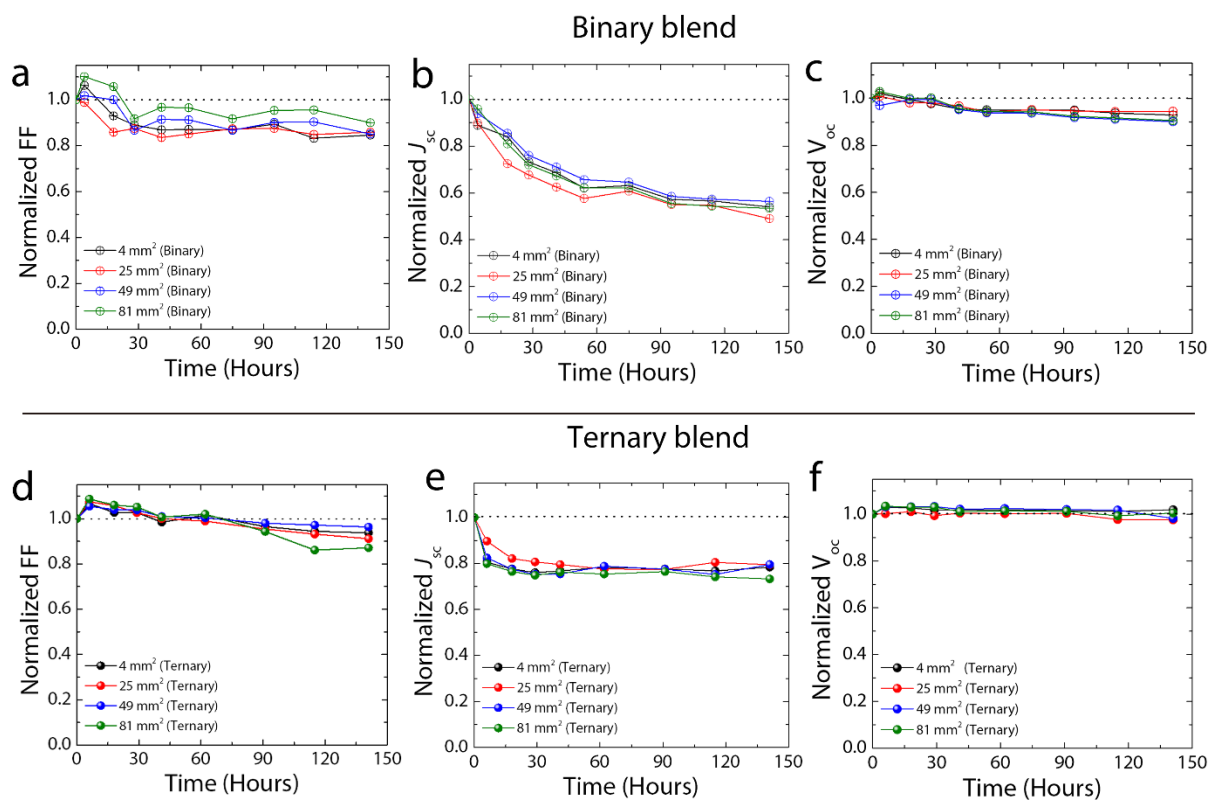

**Figure S3.** Device degradation: Various parameters evaluated at different areas of binary and ternary devices as a function of illumination time in air.

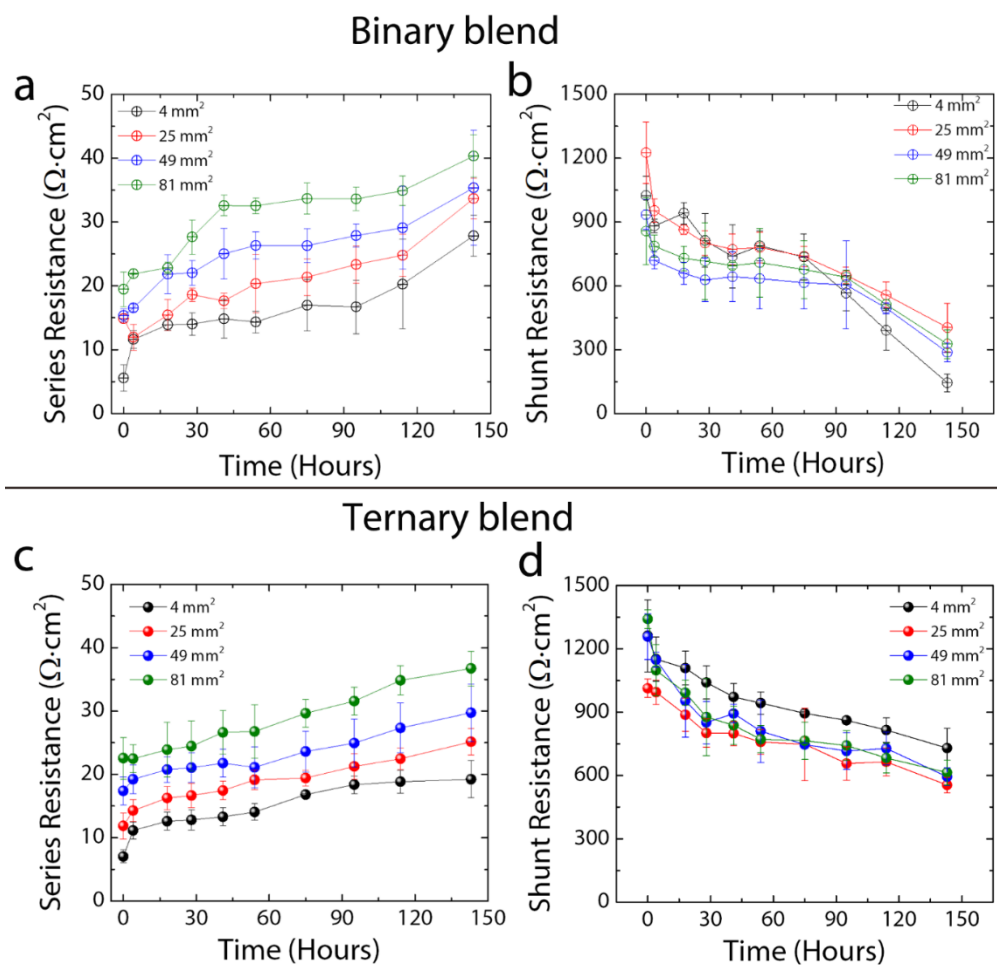

**Figure S4.** Series and shunt resistance ( $\Omega \cdot \text{cm}^2$ ) evaluated at different areas of binary and ternary devices as a function of illumination time in air.

## Binary blend (2-D images)

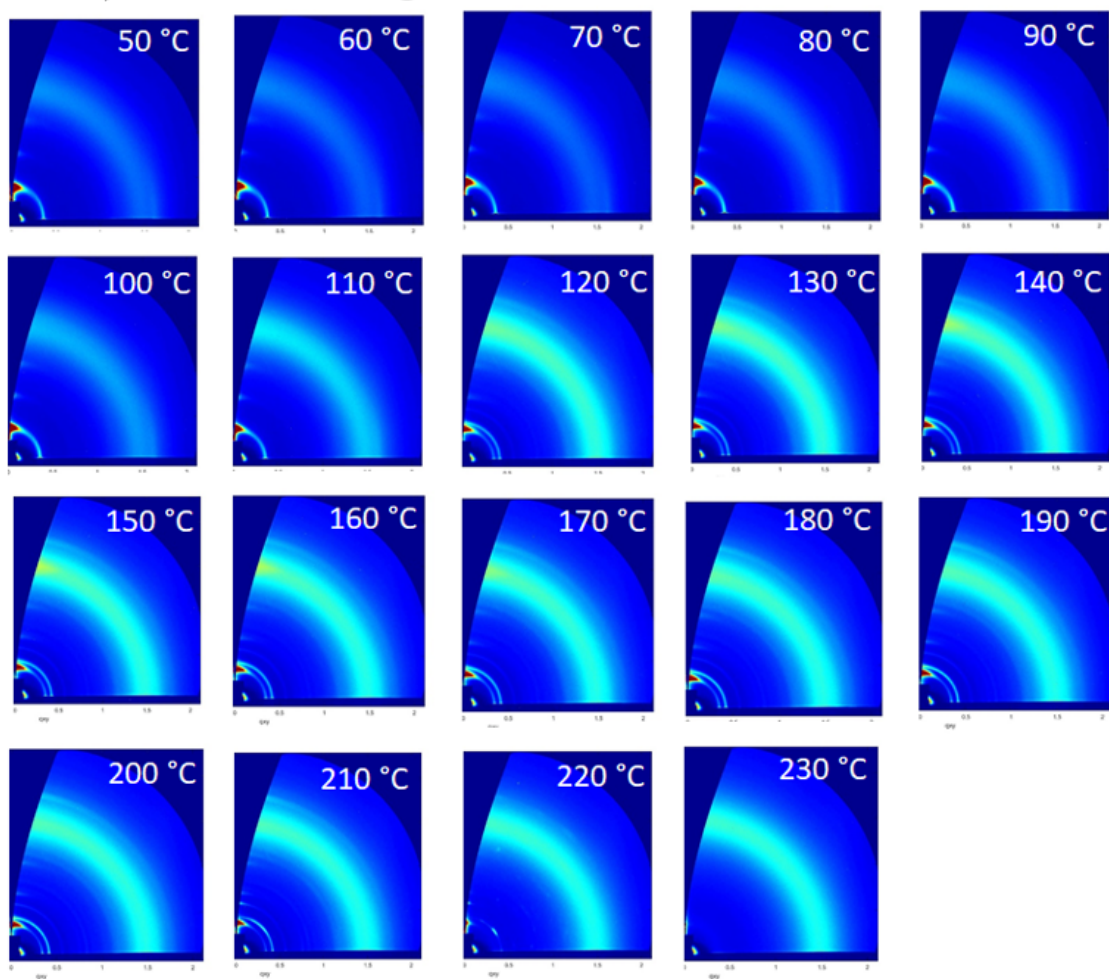

**Figure S5.** Temperature-dependent 2-D GIWAXS patterns of the binary blend system.

### Ternary blend (2-D images)

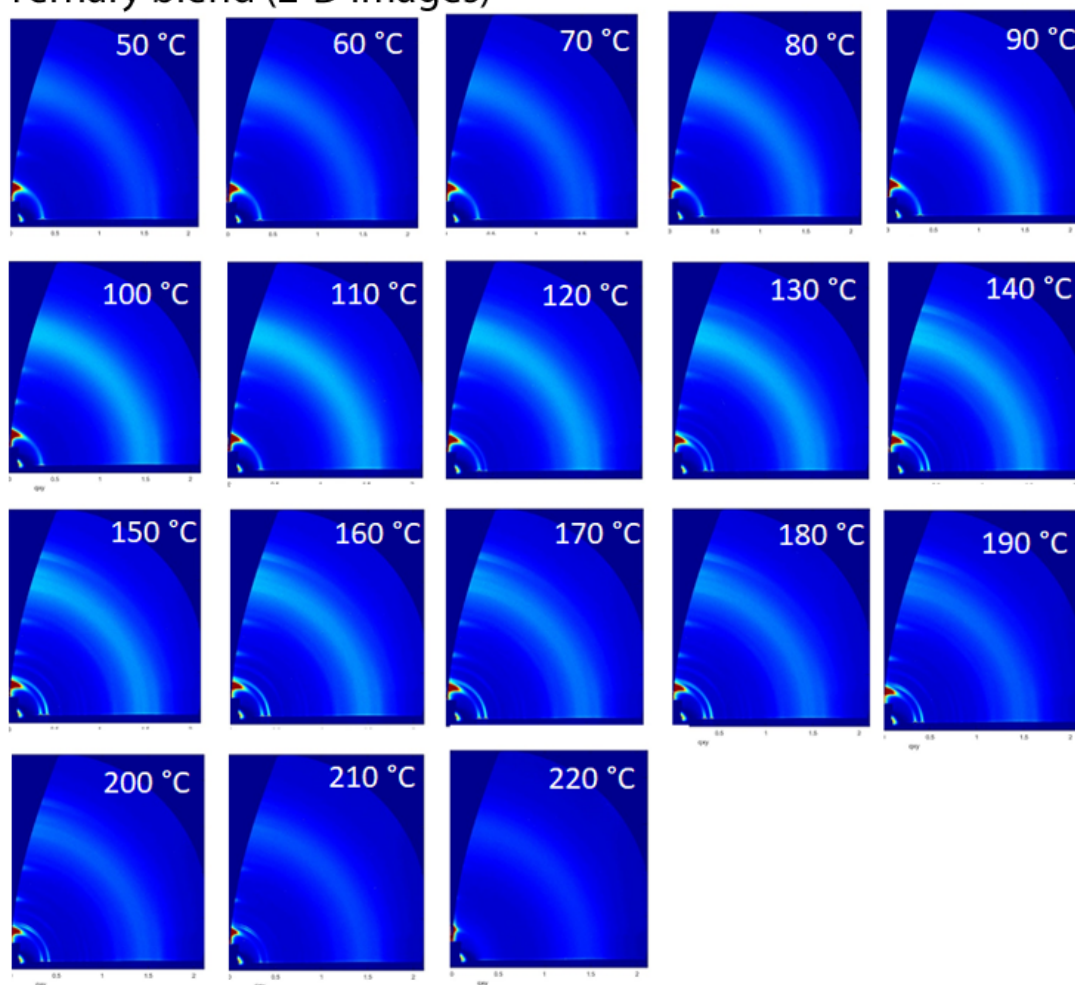

**Figure S6.** Temperature-dependent 2-D GIWAXS patterns of the ternary blend system.



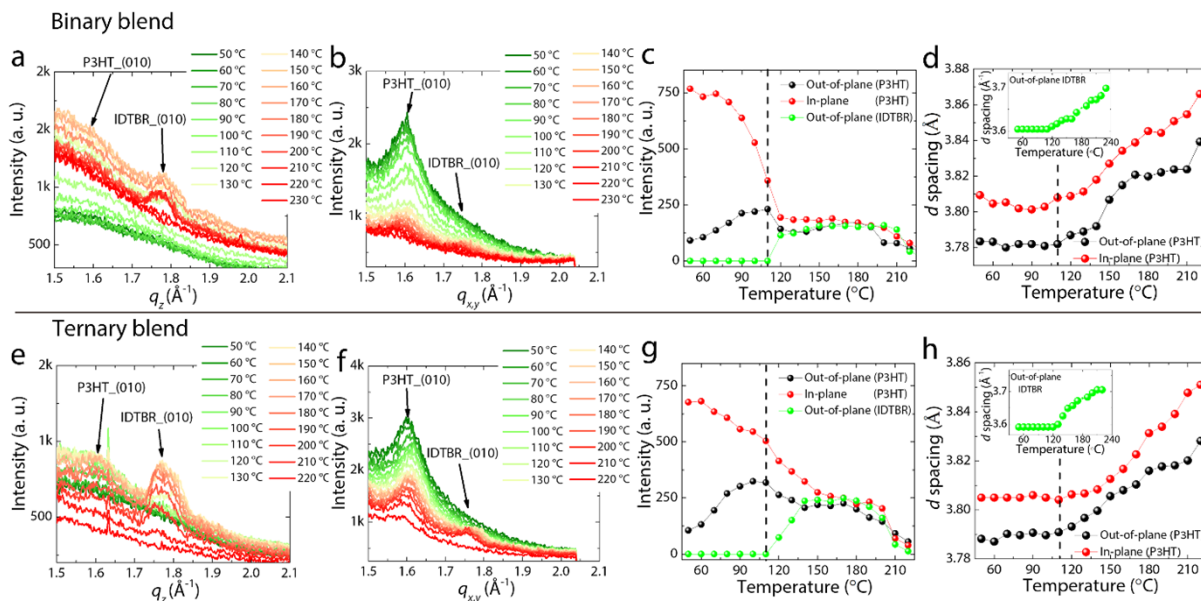

**Figure S7.** **a** and **b**, Temperature-dependent one-dimensional (1-D) GIWAXS profiles of the binary blend along the OOP and IP directions, respectively. **c** and **d**, Intensities and  $d$  spacings of the diffraction peaks for P3HT and O-IDTBR in the binary film along the OOP and IP directions **e** and **f**, Temperature-dependent one-dimensional (1-D) GIWAXS profiles of the ternary blend along the OOP and IP directions, respectively. **g** and **h**, Intensities and  $d$  spacings of the diffraction peaks for P3HT and O-IDTBR in the binary film along the OOP and IP directions.

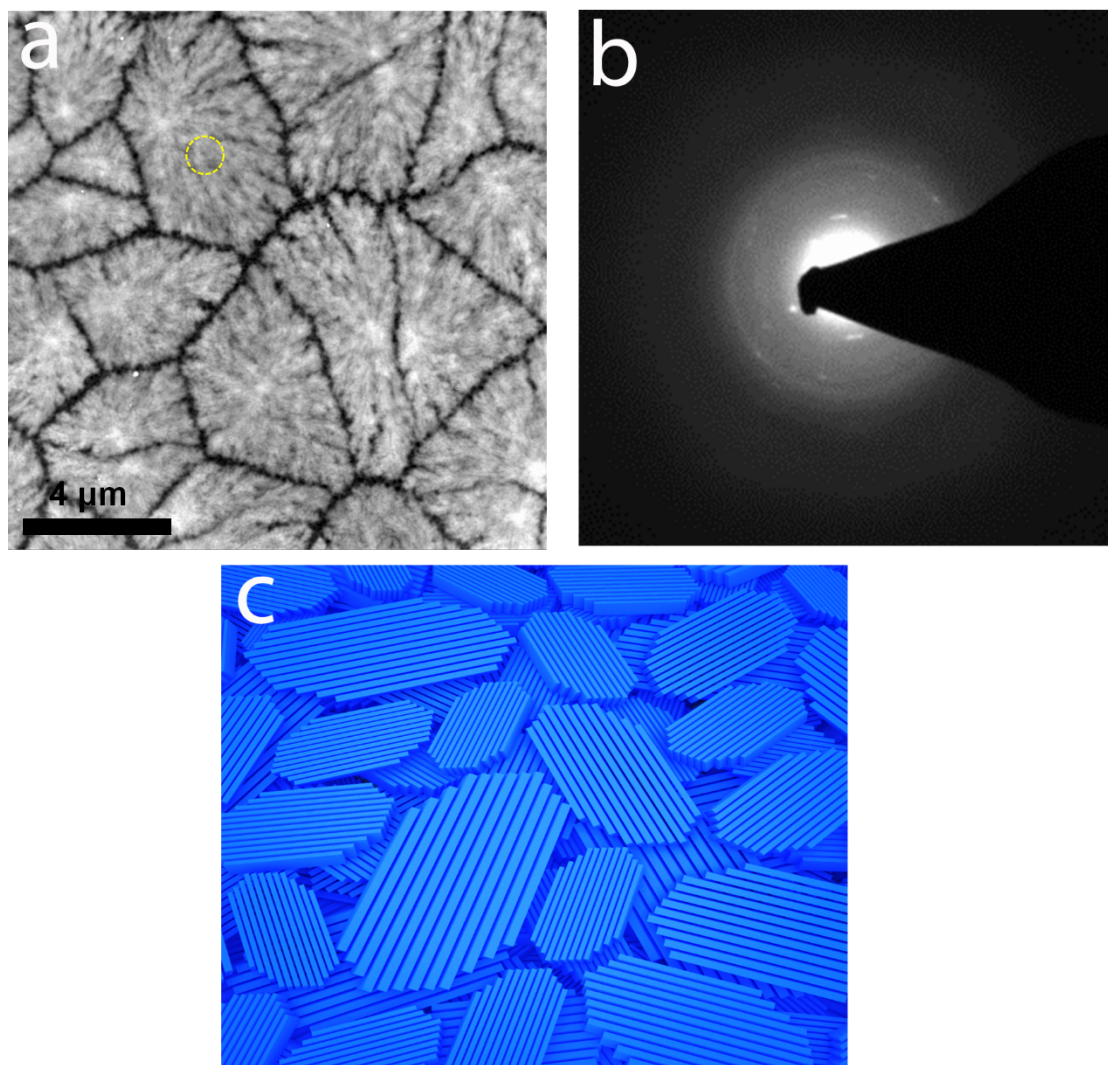

**Figure S8.** (a) A high-angle annular dark field scanning TEM (HAADF-STEM) image of the binary (P3HT:O-IDTBR) blend annealed at 160 °C with (b) a SAED pattern obtained from the area marked by a yellow circle in figure S6 (a). (c) A schematic image of the many randomly orientated domains of different phases of O-IDTBR molecules within a grain.

Binary Blend (160 °C)

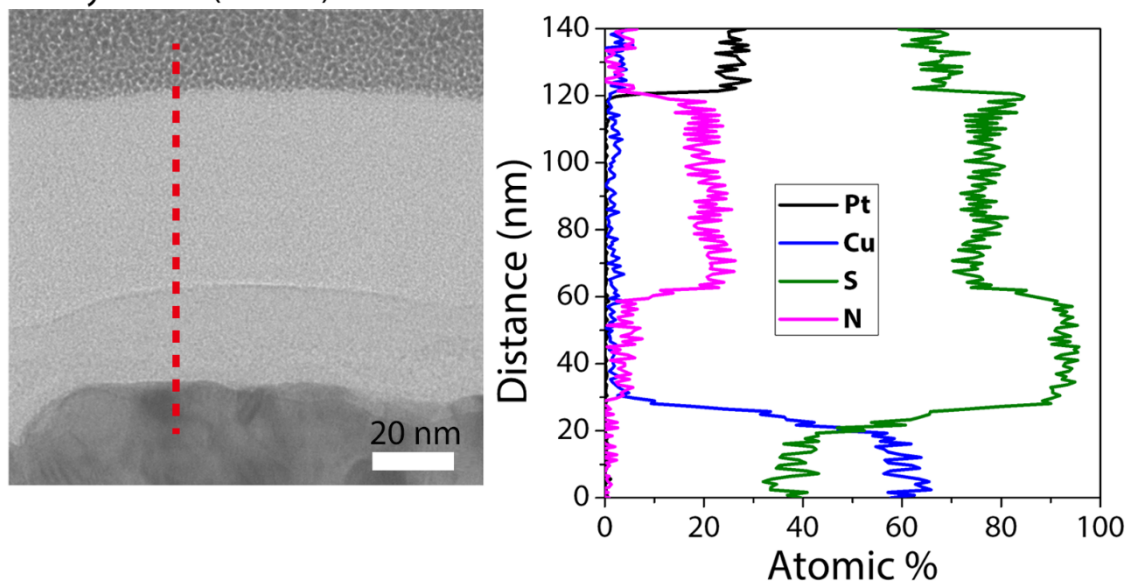

**Figure S9.** A cross-sectional STEM image and its corresponding electron dispersive spectroscopy (EDS) line profiles of the binary blend film annealed at 160 °C, respectively.

Each red dotted line indicates the position of the EDX line scan.
